# 1 Efficient Development of Platform Cell Lines Using CRISPR-Cas9 2 and Transcriptomics Analysis

3  
4 Andrew Tae-Jun Kwon<sup>1</sup>, Kohta Mohri<sup>2</sup>, Satoshi Takizawa<sup>1</sup>, Takahiro Arakawa<sup>1</sup>,  
5 Maiko Takahashi<sup>2</sup>, Bogumil Kaczkowski<sup>1</sup>, Masaaki Furuno<sup>1</sup>, Harukazu Suzuki<sup>1</sup>,  
6 Shunsuke Tagami<sup>2</sup>, Hidefumi Mukai<sup>2\*</sup>, Erik Arner<sup>1\*</sup>

7 <sup>1</sup> RIKEN Center for Integrative Medical Sciences, Japan

8 <sup>2</sup> RIKEN Center for Biosystems Dynamic Research, Japan

9 \* Correspondence: [erik.arner@riken.jp](mailto:erik.arner@riken.jp); [hmukai@riken.jp](mailto:hmukai@riken.jp)

10

## 11 Abstract

12

13 Antibody-drug conjugates offers many advantages as a drug delivery platform that allows  
14 for highly specific targeting of cell types and genes. Ideally, testing the efficacy of these  
15 systems requires two cell types to be different only in the gene targeted by the drug, with  
16 the rest of the cellular machinery unchanged, in order to minimize other potential  
17 differences from obscuring the effects of the drug. In this study, we created multiple  
18 variants of U87MG cells with targeted mutation in the *TP53* gene using the CRISPR-Cas9  
19 system, and determined that their major transcriptional differences stem from the loss of  
20 p53 function. Using the transcriptome data, we predicted which mutant clones would have  
21 less divergent phenotypes from the wild type and thereby serve as the best candidates to be  
22 used as drug delivery testing platforms. Further *in vitro* and *in vivo* assays of cell  
23 morphology, proliferation rate and target antigen-mediated uptake supported our  
24 predictions. Based on the combined analysis results, we successfully selected the best  
25 qualifying mutant clone. This study serves as proof-of-principle of the approach and paves  
26 the way for extending to additional cell types and target genes.

27

28 **Keywords:** CRISPR-Cas9, TP53, CAGE, transcriptomics

29

30

## 31 1 Introduction

32

33 Targeted drug delivery through the use of monoclonal antibodies has been a prominent  
34 therapeutic research area due to its promise of avoiding negative drug side effects by  
35 targeting diseased cells expressing specific antigens (Scott et al., 2012). This can be  
36 especially beneficial in cancer treatment, as the cytotoxic compounds currently used in  
37 chemotherapy also bring about serious negative side effects in the patients (Firer and  
38 Gellerman, 2012). While monoclonal antibodies by themselves often have low therapeutic  
39 effects, they can be conjugated to highly potent drugs and act as their delivery vehicles to

40 their target cells marked by specific surface antigens, preventing the drugs from adversely  
41 affecting healthy cells (Panowski et al., 2014). Especially promising are peptidic inhibitors  
42 that can target specific protein-protein interactions and bring about desired cellular changes,  
43 including apoptosis (Sorolla et al., 2020). Antibody drug conjugates (ADCs), as these  
44 pairings are known, have been lauded as a revolutionary step in anti-cancer drug  
45 development, but successful clinical application has proven challenging and the number of  
46 clinically approved systems remains low due to the complicated requirement of optimizing  
47 (Peters and Brown, 2015; Tang et al., 2019). Successful development of an ADC is a  
48 complicated process that requires the simultaneous optimization of tumour-specific antigen  
49 and its counterpart antibody, the stable linker between the antibody and the therapeutic  
50 agent, and finally, the agent itself. Current ADC development strategies often employ a  
51 limited number of existing microtubule inhibitors and their derivatives as the therapeutic  
52 agent payload, whose performances are measured with both *in vitro* and *in vivo* cytotoxicity  
53 tests (Lambert and Chari, 2014; Mullard, 2013). Efforts to expand the list of therapeutic  
54 agents that can be used as ADC payload to other classes of compounds are ongoing, but the  
55 choices still remain limited (Stein et al., 2018).

56

57 Given the requirements, novel ADC development would benefit from the availability of *in*  
58 *vitro* testing platforms through which the specificity and the efficacy of both the antibody  
59 and the drug can be evaluated. A number of human cell line models exists for testing  
60 cellular response to anticancer drugs, but ADC development entails some additional  
61 requirements to what is already available (Niu and Wang, 2015). Core requirements of a  
62 good testing platform for ADCs are that both the test and control cell types express the  
63 common antigens targeted by the antibodies at similar levels, and that any differences in the  
64 cellular changes induced by the drug stem mainly from the disruption of its target. If the  
65 first condition is not met, drugs would not be absorbed into the test and control cells at the  
66 same levels, complicating downstream efficacy evaluations. As for the second condition, it  
67 is necessary to limit the extent of off-target effects of the administered drugs so that they  
68 would not add layers of complication in interpreting the cellular changes introduced by the  
69 drugs. Unfortunately, because of the general lack of cell line pairings that differ in the drug  
70 target genes only, researchers have to contend with using two distinct cell types with  
71 differing origins to evaluate drug efficacy, despite the inherent risks of doing so. For  
72 example, there are numerous ongoing studies on p53, which is the most well-known and  
73 researched tumour suppressor gene, and a large portion of these studies focus on  
74 manipulating its expression in cancer cells through various therapeutic means including  
75 ADCs (Dangelmaier et al., 2019; Hafner et al., 2019; Kamp et al., 2016; Leroy et al., 2017;  
76 Mantovani et al., 2019). Another advantage afforded by well researched genes such as p53  
77 is that one can utilize the already existing drugs and focus on the development of novel  
78 delivery mechanisms only. A popular testing platform for this purpose consists of the  
79 glioblastoma cell lines U87MG and U251MG, with the former having wild type p53 and  
80 the latter with an inactivated version that can no longer interact with MDM2, the main  
81 regulator of p53 expression (Cobbs et al., 2008; Leroy et al., 2017; Qin et al., 2019; Yount

82 et al., 2001). The testing platform based on these two cell line pairs is particularly pertinent  
83 to ADC research, as they both express integrin  $\alpha\beta 3$  that can be targeted by the same  
84 antibody and drugs that disrupt p53-MDM2 interaction are under intense research focus.  
85 Integrin  $\alpha\beta 3$  is a frequently targeted cancer cell surface marker, as it is well known that its  
86 expression changes with tumour growth and metastasis (Sloan et al., 2006; Weigelt et al.,  
87 2005). However, although both U87MG and U251MG are glioblastoma cell lines, they are  
88 actually distinct cell types with completely different sources of origin, such that their  
89 genetic differences extend far beyond just p53 (Camphausen et al., 2005). Thus, even  
90 though many studies on p53 are performed on these two cell lines due to the known  
91 mutation in U251MG, the interpretation of the obtained results can be obfuscated by other  
92 inherent cellular differences.

93  
94 Ideally, the best way to overcome this hurdle is to create targeted mutants of specific cell  
95 lines using genome engineering. One of the major developments in the field of genome  
96 engineering during the last decade has been the utilization of the CRISPR/Cas9 system for  
97 targeted gene editing, bringing unprecedented precision and ease of use (Hsu et al., 2014;  
98 Jinek et al., 2012; Ran et al., 2013). The system and its derivatives have gone through  
99 intense development and refinement, and they are now employed for a multitude of  
100 selective gene editing and regulation modifications. Wanzel *et al.* have employed this  
101 system to create p53 knockout mutants in the human colorectal cancer cell line HCT116 to  
102 investigate the mechanisms behind the disruption of p53-MDM2 interaction by the known  
103 inhibitor RITA (Wanzel et al., 2015). They targeted multiple intronic and exonic regions,  
104 resulting in mutants with both small indel mutations and large deletions and experimentally  
105 validated p53 inactivation in the resulting p53 knockout mutants. However, there was no  
106 comprehensive follow-up analysis of the p53 KOs to examine the extent of the  
107 transcriptomic changes induced by these mutations, both from the p53 modification or  
108 other potential off target effects.

109  
110 In this study, we employed CRISPR-Cas9 to make targeted mutations of the *TP53* gene in  
111 U87MG, with the goal of creating a mutant cell line that has otherwise minimal differences  
112 from the wild type. We performed transcriptome analysis of the mutant clones created to  
113 examine the genetic differences using Cap Analysis of Gene Expression (CAGE), which  
114 can identify the location of transcription start sites and their expression levels (Carninci et  
115 al., 2006; Kanamori-Katayama et al., 2011). We confirmed that the extent of genetic  
116 differences between the wild type U87MG cells and the mutant clones were not extensive,  
117 and that these changes were mostly attributable to the inactivation of p53. We down-  
118 selected from the clones based on further analysis of their transcriptomic profiles compared  
119 to the wild type, and subjected them to further experimental validation to ascertain that  
120 there are no major changes to their *in vivo* phenotypes compared to the wild type U87MG  
121 cells and that other attributes necessary for their utility as testing platform for ADC  
122 development remain intact.

123

## 124 **2 Materials and Methods**

125

### 126 **2.1 CRISPR-Cas9**

127 *Cell culture:* U87MG cells (ATCC HTB-14) were grown in high glucose DMEM (Gibco)  
128 supplemented with 10% fetal bovine serum (Gibco), 100 U/mL penicillin (Gibco) and 100  
129 µg/mL streptomycin (Gibco) at 37°C with 5% CO<sub>2</sub>.

130 *Lentiviruses:* To prepare the TP53 knockout cells by CRISPR-Cas9 gene editing, sgRNA  
131 targeting TP53 gene exon 5 (5'-GTTGATTCCACACCCCC.GCCcgg-3') was cloned into  
132 lentiGuide-Puro vector (Addgene, #52963), named lentiGuide-Puro\_e5.2. Lentivirus for  
133 lentiCas9-Blast (Addgene, #52962) and lentiGuide-e5.2-Puro were prepared in a mixture of  
134 the following packaging constructs: pCMV-VSV-G-RSV-Rev and pCAG-HIVgp (provided  
135 by RIKEN BRC, Japan) according to the protocol (Suzuki et al., 2012).

136 *Mutation:* LentiCas9-Blast lentivirus transduction was performed with 8 µg/mL polybrane  
137 supplemented DMEM at 2 MOI for 24 h. Fresh DMEM without polybrane was used 24 h  
138 after transduction to avoid cell damage. After 48 hours, transduced cells were selected onto  
139 medium containing 15 µg/mL blasticidin, and incubated for 7 days. LentiGuide-Puro\_e5.2  
140 lentivirus was transduced into Cas9-expressing cells at 2 MOI, and selected by 1 µg/mL  
141 puromycin and incubated for 4 days. Cleavage efficiency was estimated through indel  
142 detection performed using the Guide-it Mutation Detection Kit from Clontech.

143 *Clone selection:* Individual clones were scaled up in a 10 cm dish, and screened with  
144 western blot using anti-human p53 IgG (CST, rabbit polyclonal). Sanger sequencing of the  
145 TP53 cleavage target region in the selected clones was performed using Applied  
146 Biosystems 3730xl DNA Analyzer with BigDye Terminator v3.1 Cycle Sequencing Kit  
147 (ThermoFisher Scientific), and aligned to the wild type region using CLUSTAL version 2.1  
148 (Larkin et al., 2007).

149 *Western blotting:* Cells were lysed in RIPA buffer (Pierce) containing proteinase inhibitors  
150 (Halt Proteinase Inhibitor Cocktail, Thermo Scientific). Protein concentration was  
151 determined with BCA Protein Assay Kit (Pierce). Protein lysates (20 µg) were separated on  
152 NuPAGE Tris-Acetate Gels (Invitrogen) and transferred onto PVDF membranes.

153 Membranes were blocked with 5% skim milk in TBST for 1 h at room temperature and  
154 incubated with anti-human p53 antibody (Cell Signaling Technologies, #9282, rabbit  
155 polyclonal, 1:1000) in TBST containing 5% skim milk (4°C, overnight). Membranes were  
156 incubated with anti-rabbit IgG-HRP (GE Healthcare, NA934V, 1:2000) in TBST for 2 h at  
157 room temperature. Detection was performed with ECL Prime (GE Healthcare) and imaged  
158 by chemiluminescence imaging system FUSION SOLO S (VILBER LOURMAT).

159 *Immunofluorescence:* Cells were seeded with 80,000 cells per well on a coverslip coated  
160 with L-polylysine into 24-well plates. After overnight incubation, cells were fixed with 4%  
161 paraformaldehyde in PBS for 10 min at room temperature. Cells were blocked with 1%  
162 BSA-0.3 M glycine in PBST and incubated with mouse anti-human integrin  $\alpha\beta3$  IgG  
163 (1:200, monoclonal, LM609, Abcam, ab190147) in 1% BSA-PBST overnight at 4°C. For  
164 isotype control, mouse (G3A1) IgG1 Isotype Control (Cell Signaling Technologies, #5451)

165 was used. Cells were incubated with donkey anti-mouse IgG-Alexa 488 conjugate (1:200,  
166 Jackson ImmunoResearch Laboratories, code: 715-545-150) in 1% BSA-PBST for 1 h at  
167 room temperature. The samples were embedded in VECTASHEELD mounting medium  
168 (Vector Laboratories), and imaged by OLYMPUS IX71.

169 *Reverse transcriptase polymerase chain reaction*: With starting RNA amount of 100 ng per  
170 sample, reverse transcription of *ITGAV*, *ITGB3*, and *GAPDH* (internal control) was  
171 performed using SuperScript III and oligo-dT primers on GeneAmp PCR System 9700.  
172 Quantitative PCR was performed with Hotstar Taq, customized primers on the ABI  
173 7900HT Fast Real-Time PCR System. Experiments were done in triplicates per cell type.  
174

## 175 **2.2 CAGE data generation and analysis**

176 *Data generation*: Total RNA was extracted from samples using RNeasy Mini Kit (Qiagen).  
177 The CAGE libraries were constructed using the published nAnT-iCAGE protocol (Murata  
178 et al., 2014): 5 µg of total RNA per sample from the mutant clones and the wild type cells  
179 was reverse transcribed with SuperScript III reverse transcriptase to produce cDNAs, which  
180 were then biotinylated and cap trapped to capture their 5' ends. After barcoding and  
181 purification, they were sequenced on illumina HiSeq 2500 (50 nt single read). The  
182 sequenced reads were processed using the MOIRAI pipeline (Hasegawa et al., 2014). After  
183 filtering for rDNA and low quality reads, they were mapped to the human genome (hg38)  
184 using BWA version bwa version 0.5.9 (r16), with default parameters except: (1) for  
185 `bwa_aln`, maximum long deletion (-d) = 10, best hit limit (-R) = 30, seed length (-l) = 32,  
186 and (2) for `bwa_samse`, maximum number of alignments (-n) = 100 (Li and Durbin, 2009).  
187 The reads were overlapped with the FANTOM5 robust promoter set  
188 ([http://fantom.gsc.riken.jp/5/datafiles/latest/extra/CAGE\\_peaks/](http://fantom.gsc.riken.jp/5/datafiles/latest/extra/CAGE_peaks/)) and mapped to the nearest  
189 GENCODE v27 annotations within 500 bp (FANTOM Consortium, 2014; Frankish et al.,  
190 2019). CAGE clusters within 20 bp of each other were merged together, and enhancer  
191 clusters overlapping existing GENCODE annotations were removed. For each processed  
192 CAGE cluster, the number of overlapping 5' ends of the sequencing reads were summed to  
193 arrive at the raw expression counts.

194 *Data analysis*: The expression counts table was first filtered for lowly expressed CAGE  
195 clusters by first converting the values to counts per million (CPM), then removing those  
196 expressed in less than 3 samples with at least 1 CPM and greater than 1 sample with at least  
197 3 CPM. Differential expression analysis of the expression table was performed with edgeR  
198 (version 3.28.0) in R 3.6.1 with TMM normalization and TREAT function with log fold  
199 change threshold of 1 and false discovery rate threshold of 0.05 (R Development Core  
200 Team, 2008; Robinson et al., 2010). KEGG pathway enrichment was performed using  
201 edgeR's built-in `kegga` function and filtered for p-value threshold of 0.05. Motif Activity  
202 Response Analysis (MARA) was performed with the implementation used in Alam *et al.*,  
203 2020 (Alam et al., 2020; Balwierz et al., 2014). Briefly, transcription factor binding sites  
204 were predicted using the SwissRegulon set of motifs in 300 bp downstream and 100 bp  
205 upstream regions around each CAGE cluster, and motif activities calculated with the

206 normalized CAGE expression table (Pachkov et al., 2007). The motif activities were  
207 converted to Z scores, and their differences between each mutant clone and the wild type  
208 were taken and visualized. Motifs with Z scores greater than 2 were marked as the  
209 significant set of motifs with notable regulatory effects on expression. TP53 ChipSeq peaks  
210 data sets were downloaded from Chip-Atlas (<https://chip-atlas.org/>) and overlapped with  
211 FANTOM5 promoter regions with +/-500 window. The TF activities were then calculated  
212 as mean log<sub>2</sub> fold change of expression for genes with TP53 binding at the promoters. Off  
213 target regions for the sgRNAs used were predicted using CasOFFinder (Bae et al., 2014),  
214 and the GENCODE v27 annotations within 1 kb in either direction were retrieved and  
215 compared against the list of differentially expressed genes. The scripts used to perform  
216 these analyses are available at ([https://github.com/tjkwon/CRISPR\\_p53](https://github.com/tjkwon/CRISPR_p53)).

217

### 218 **2.3 Cell proliferation assay**

219 U87MG (p53 wild-type) or the p53-mutant cells were seeded into 96-well plates at a  
220 density of 2,000 cells/well, and incubated for 24 h before treatment. p53-MDM2 interaction  
221 inhibitor, or nutlin-3a was added to cells at different concentrations, and the cells were  
222 incubated for 5 days at 37 °C. Then, 10 µL of a WST-8 reagent (Nacalai Tesque, inc.) was  
223 added to each well, and the cells were incubated for 2 h at 37 °C. The absorbance was  
224 measured using a iMark™ Microplate Reader (Bio-Rad Laboratories, Inc.) at 450 nm to  
225 count the living cells. IC<sub>50</sub> values for nutlin-3a were calculated from nonlinear regression  
226 analysis (four parameters) using GraphPad Prism 7 (GraphPad Software Inc., La Jolla, CA,  
227 USA).

228

### 229 **2.4 Cellular uptake and intracellular localization**

230 FITC-labeled RGD peptide (Gly-Arg-Gly-Asp-Ser-Pro-OH), or FITC-RGD peptide was  
231 purchased from AnaSpec (Fremont, CA, USA). To investigate cellular uptake of FITC-  
232 RGD peptide, U87MG or the p53-mutant cells were seeded into 24-well plates at a density  
233 of  $2.5 \times 10^5$  cells/well, and incubated for 24 h before treatment. The cells were incubated  
234 with 20 µM FITC-RGD peptide for 4 h at 37 °C. After the cells were washed twice with  
235 PBS and harvested, the fluorescent intensity of cells was determined by Cell Sorter SH800  
236 (Sony Corp., Tokyo, Japan) using SH800 software (Sony Corp.). To investigate  
237 intracellular localization of FITC-RGD peptide, U87MG or the p53-mutant cells were  
238 seeded into 3.5 cm glass bottom dishes at a density of  $9 \times 10^5$  cells/dish, and incubated for  
239 24 h before treatment. Cells were incubated with 20 µM FITC-RGD peptide for 4 h at 37  
240 °C. The cells were washed twice with PBS, and incubated with 100 nM LysoTracker Red  
241 DND-99 (Invitrogen, Thermo Fisher Scientific, Inc., Waltham, MA, USA) for 30 min at 37  
242 °C. After washing twice with PBS, the cells were fixed in 4% paraformaldehyde for 20 min.  
243 After washing twice with PBS again, the coverslips were mounted on glass slides with  
244 ProLong™ Diamond Antifade Mountant with DAPI (Invitrogen, Thermo Fisher Scientific,  
245 Inc.), and observed using a confocal microscope (LSM710, Carl Zeiss GmbH, Oberkochen,  
246 Germany).

247

## 248 **2.5 Tumour growth of rates in subcutaneously xenografted mice**

249 Male BALB/c nu/nu mice (5-week old) were purchased from Japan SLC, Inc. (Hamamatsu,  
250 Japan). Mice were subcutaneously inoculated with U87MG or the p53-mutant cells ( $3.0 \times$   
251  $10^6$  cells per mouse) in 100  $\mu$ L of Hank's balanced salt solution (HBSS, Nacalai Tesque,  
252 Inc., Kyoto, Japan). The tumour size was measured with a slide caliper, and tumour  
253 volume was calculated using the following formula: tumour volume ( $\text{mm}^3$ ) =  $0.5 \times$  length  
254 (mm)  $\times$  [wide (mm)]<sup>2</sup>. All animal experimental protocols were approved by the Ethics  
255 Committee on Animal Care and Use of the RIKEN Kobe Institute.

256

257 For the above 4 assays, statistical differences were analyzed using one-way analysis of  
258 variance (ANOVA) followed by the Dunnett tests for multiple comparisons. Kaplan–Meier  
259 curves were generated, and log-rank tests were performed.  $P < 0.05$  was considered to be  
260 statically significant.

261

## 262 **3 Results**

263

### 264 **3.1 3.1. Generation of p53-mutated U87MG cells and initial comparisons to wild type** 265 **cells**

266

267 We decided on the CRISPR-Cas9 system based on guide RNA-containing plasmid  
268 transfection and NHEJ pathway, as the goal of this study was to simply mutate p53 leading  
269 to disruption of known downstream interactions, and as such did not require the specificity  
270 offered by other methods. To increase our chance of success, we initially attempted the  
271 mutation of the p53 gene body in U87MG cells with different sets of single guide RNAs  
272 (sgRNAs), targeting introns 1, 2 and 9 for large deletions and exons 3 and 5 for indels.  
273 When screened with Guide-it mutation detection kit and western blot, the sgRNA targeting  
274 exon 5 was found to have achieved successful indel mutations in the target region (Figure  
275 1, Supplementary Figure 1). These indels were confirmed with Sanger sequencing, and 7  
276 unique p53 mutant clones were identified; their lengths suggest that they likely introduced  
277 nonsense mutations (Supplementary Table 1). After culturing and scaling up the mutant  
278 clones, their morphology was visually compared against the wild type U87MG cells, and in  
279 general, they maintained similar shapes and growth rates as their wild type counterparts  
280 (Supplementary Figure 2). The only exception was clone c4.2, which exhibited a higher  
281 growth rate than the wild type cells. When immunostained for integrin  $\alpha\beta 3$ , all of the  
282 mutant clones exhibited fluorescence levels at similar levels to the wild type, suggesting  
283 that the expression of integrin  $\alpha\beta 3$  was not impacted significantly. All of the mutant  
284 clones exhibited similar levels of the integrin expression, with no discernible differences in  
285 their fluorescence. We also carried out reverse transcriptase polymerase chain reaction (RT-  
286 PCR) of *ITGAV* and *ITGB3*, the two component genes of integrin  $\alpha\beta 3$  (Supplementary  
287 Figure 3). All the mutant clones expressed *ITGAV* and *ITGB3* at levels similar or greater

288 than that of the wild type except for clone c4.2, which showed slightly lower *ITGB3*  
 289 expression, and similar trends could be observed when the expression levels were compared  
 290 against *GAPDH* for internal control. These observations demonstrate that the unwanted  
 291 negative regulation of the integrin genes from the CRISPR-Cas9 process was minimal. As  
 292 we envision utilizing the created mutant clones as an ADC testing platform with integrin  
 293  $\alpha\beta3$  as the antigen, it is vital that the integrin expression is maintained in both the mutant  
 294 clones and the wild type. Together, these results confirmed that the CRISPR-Cas9 process  
 295 successfully disrupted p53 protein level abundance with minimal effects on cell  
 296 morphology and integrin levels.

297

298 **Figure 1.** Targeted mutation of p53 gene at exon 5 in U87MG cells using CRISPR-Cas9  
 299 system.

300 (a) Flowchart of the p53 mutation process. Virus particles containing the lentiCas9-Blast  
 301 and lentiGuide-Puro\_e5.2 vectors are constructed and transfected into U87MG cells in  
 302 sequence. Those cells with indels are isolated and cloned for scale up, then candidates are  
 303 selected based on western blot results, which are then subjected to Sanger sequencing for  
 304 final confirmation of successful mutation. (b) The sgRNA target (red) in exon 5 (blue)  
 305 and the forward and reverse primer regions for sub-cloning (green and orange, respectively) are  
 306 shown. Clone 5.11 used different forward and reverse primer regions from the other clones.  
 307

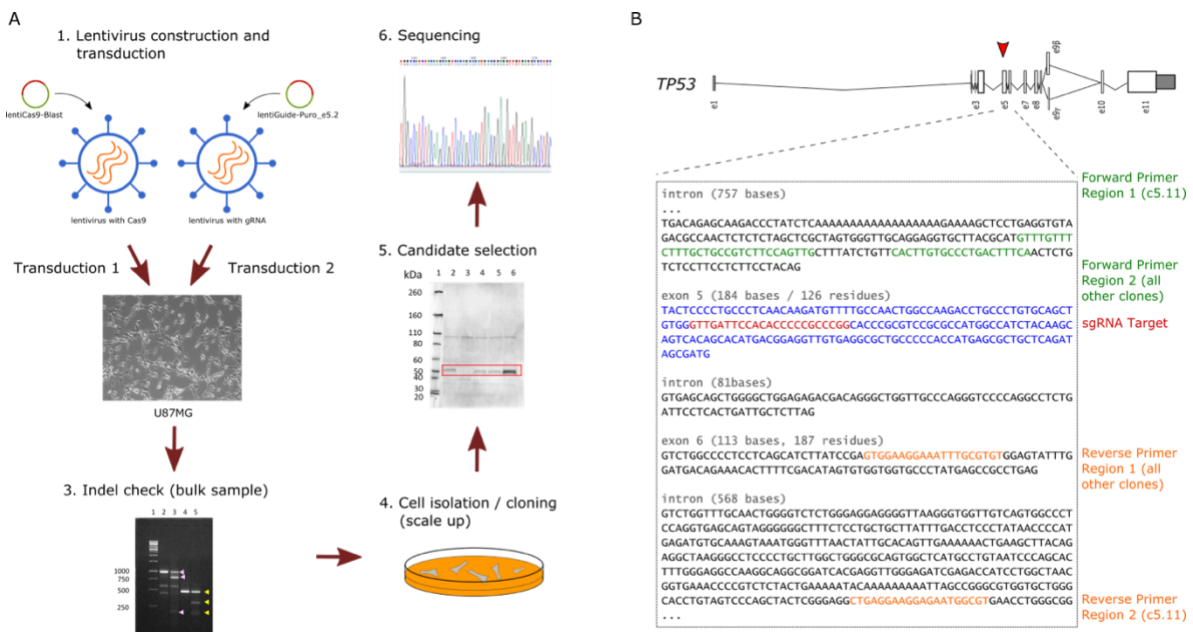

308

309

### 310 3.2 Transcriptome comparison of mutants using CAGE analysis

311

312 p53 is involved in numerous cellular processes, and as such it regulates and is regulated by  
 313 numerous interacting partners, both upstream and downstream. Thus, any mutation in p53  
 314 is bound to have both direct and indirect regulatory effects on many other genes.

315 Furthermore, although the CRISPR-Cas9 system allows for highly specific targeted



316 mutation, off-target effects resulting in unintended genomic changes still frequently occur  
317 and must be checked for. We wanted to evaluate the extent of these gene expression  
318 changes incurred by the p53 disruption using transcriptome profiling in each of the mutant  
319 clones and ascertain that the changes were acceptable for our purpose. We used cap  
320 analysis of gene expression (CAGE), which captures the 5' ends of transcripts to identify  
321 transcription start sites (TSS) down to single nucleotide resolution, not only for promoters  
322 of protein coding genes but also noncoding RNAs and enhancers. Compared to RNA-seq,  
323 CAGE also has the advantage of detecting and analyzing alternative promoter usage at each  
324 gene. Comparing the transcriptome profiles of each mutant clone to that of the wild type  
325 using CAGE, enabled us to confirm the disruption of the p53-mediated pathways and use  
326 the measured expression changes to calculate their distances from the wild type cells.

327

328 We prepared the combined expression table for all samples by summing the number of  
329 reads per CAGE clusters based on the FANTOM5 promoter set (see Methods). After  
330 filtering for lowly expressed promoters and normalizing the expression levels, we arrived at  
331 the expression counts table of 19,931 CAGE clusters representing 14,994 genes (12,475  
332 known) (Supplementary Table 2). With the normalized expression table, we first visualized  
333 the expression changes of *TP53*, *MDM2*, and *CDKN1A*, the core regulatory partners in the  
334 p53 pathway (Figure 2a) (Enge et al., 2009). While the expression levels of *TP53* did not  
335 show any consistent patterns across different clones, *MDM2* and *CDKN1A* showed  
336 consistent down-regulation in all of the mutant clones compared to the wild type. It is  
337 important to note that CAGE measures the transcription initiation events at the promoters  
338 only, and does not cover the entire transcript body as RNA-seq would. Since the sgRNAs  
339 targeted exon 5, the mutations did not result in abolishing of the transcription initiation  
340 events; in some clones, we even observed higher levels of expression than the wild type.  
341 Instead, the p53 transcripts produced in the mutant clones likely contain nonsense  
342 mutations that result in truncated proteins with reduced functionality. Conversely, we could  
343 clearly observe the effects of the mutation in the expression patterns of p53's direct  
344 interacting partners *MDM2* and *CDKN1A*: *MDM2* expression was reduced approximately  
345 by half, and *CDKN1A* showed greater than 3-fold decrease on average compared to the wild  
346 type. Other genes known to interact with p53 or *MDM2* show down-regulation in the  
347 mutant clones as well (Supplementary Figure 4a) (Basu and Haldar, 1998; Bensaad et al.,  
348 2006; Meng et al., 2016; Serrano et al., 2013; Xiong et al., 2001). We also examined the  
349 expression levels of *ITGAV* and *ITGB3*, and confirmed that all mutant clones show  
350 expression levels similar to or greater than that of the wild type, as observed previously  
351 with RT-PCR. Especially, clone 4.8 showed notably elevated expression in *ITGAV* and  
352 *ITGB3*, suggesting that this clone may exhibit higher integrin presence on the cell surface  
353 than the other ones (Supplementary Figure 4b).

354

355 **Figure 2.** Comparison of the transcriptome profiles of the mutant clones against the wild  
356 type can be used to infer the degree of genomic changes caused by the respective mutation  
357 in each clone. (a) Normalized expression levels of *TP53*, *MDM2*, and *CDKN1A*. Both

358 *MDM2* and *CDKN1A* exhibit down-regulation in the mutant clones. (b) PCA plot of the  
359 sample transcriptomes, with first two dimensions shown. Clones c3.4, c5.5, c5.9 and c5.12  
360 cluster closely with the wild type.  
361

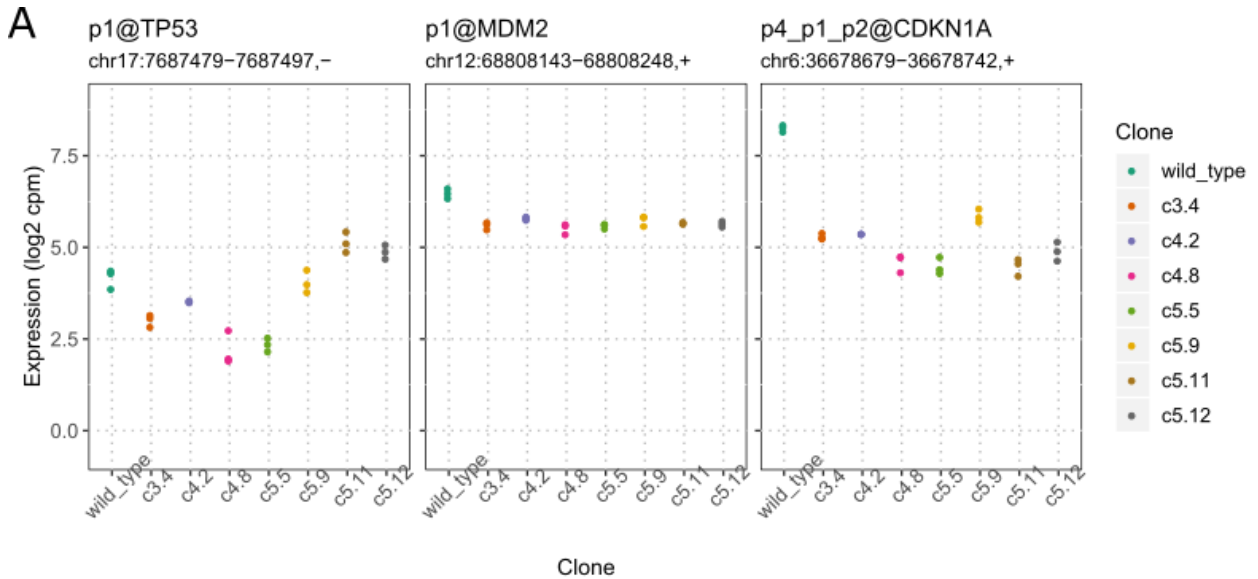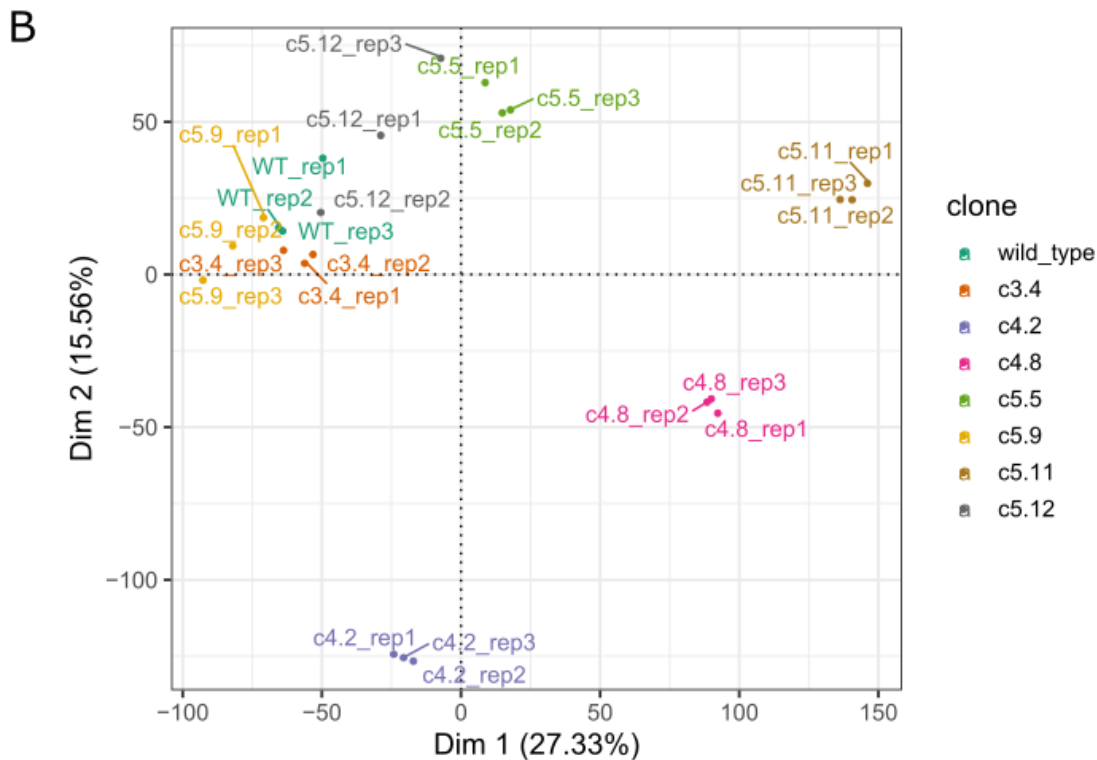

362

363

364 With the confirmation that the key marker genes show consistent changes across the mutant  
365 clones, we proceeded to evaluate the overall transcriptome similarity of each mutant clone  
366 to the wild type using principal components analysis (PCA) (Figure 2b). By reducing the  
367 dimensionality of the entire transcriptome through orthogonal projection, PCA allowed us  
368 to visualize the proximity of different samples and infer their similarity to one another.

369 When visualized using the first two dimensions of the PCA, clones c3.4, c5.5, c5.9, and  
370 c5.12 clustered closely with the wild type, whereas the clones c4.2, c4.8, and c5.11 showed  
371 higher separation from one another as well as the other clones. As expected, the replicates  
372 of the same clone type formed the tightest clusters. Hierarchical clustering of the samples  
373 confirmed these results, with clones c4.2, c4.8 and c5.11 forming the outer branches of the  
374 clustering dendrogram (Supplementary Figure 5). The results suggest that the mutations in  
375 these ‘outer’ clones affected more widespread gene expression changes than the ‘inner’  
376 clones, potentially leading to additional phenotype changes from the wild type such as the  
377 faster growth rate in clone 4.2 we observed.

378  
379 To investigate the differences between clones in more detail, we performed differential  
380 expression analysis to identify the promoters in each mutant clone showing significant up  
381 or down regulation compared to the wild type expression levels (Supplementary Figure 6,  
382 Supplementary Table 3). The number of observed differentially expressed promoters were  
383 low in all clones. c5.5 showed the lowest number (37 up, 44 down) of both up- and down-  
384 regulated promoters, while c5.9 had the highest number of down-regulated promoters (417  
385 down) and c5.12 the highest number of up-regulated promoters (126 up). The other clones  
386 showed similar numbers of differentially expressed promoters to one another, and overall  
387 there was no obvious relationship between the numbers of differentially expressed  
388 promoters and how they clustered together. This suggests that while numerous genes  
389 undergo minor but still significant expression changes due to the loss of p53 function, there  
390 may be a subset of genes with more drastic changes that contribute to the overall  
391 transcriptome differences to a higher degree. To examine whether the differentially  
392 expressed genes found were likely to be regulated by p53, we retrieved ChIP-seq binding  
393 data from ChIP-Atlas and analyzed whether there was an association between the  
394 differentially expressed genes and evidence of TP53 binding in their promoters  
395 (Supplementary Table 4). After determining which genes had TP53 binding evidence, we  
396 calculated the mean of the log fold change of expression of those genes in the mutant  
397 clones vs. the wild type and observed a consistent down-regulation of expression, further  
398 supporting the disruption of the p53-regulated genes resulting from its mutation (Figure  
399 3a). We also made computational predictions of off-target regions affected by our sgRNAs  
400 and compared the results against our list of differentially expressed genes (Supplementary  
401 Table 5). Of the 32 candidate genes located within 1k base pairs from the affected regions,  
402 none were differentially expressed in the mutant clones vs. the wild type. The only overlap  
403 observed was from the list of differentially expressed genes between the fast growth clone  
404 c4.2 vs. the other mutant clones, where *TRABD2B* and *PDE7B* were found in our potential  
405 off-target gene list.

406  
407 In order to determine which cellular pathways are disrupted with these differentially  
408 expressed genes in each mutant clone, we performed functional analysis by identifying the  
409 enriched KEGG pathways in the list of differentially expressed genes, and examined in  
410 which group of genes the p53 signalling pathway was enriched in (Supplementary Table 6).

411 As expected, we found that the genes contributing to the p53 signalling pathway were  
412 significantly enriched in the list of down-regulated genes among all comparisons ( $p < 0.05$ ),  
413 except for the clone 4.8, which was placed away from the wild type samples in the PCA  
414 plot (Figure 3b, Supplemental Figure 7). When ranking the clones by the p53 signalling  
415 pathway enrichment scores (negative logarithm of enrichment p-values), we observed that  
416 the clones c4.8 and c5.11 scored the lowest while the clones c5.5, c5.12 and c5.9 scored the  
417 highest, in agreement with our previous observation from the PCA and hierarchical  
418 clustering. Further examining the top 10 pathways ordered by their median enrichment  
419 scores across the samples, we observed that the ‘inner’ clones show higher enrichment for  
420 cytokine-cytokine interaction pathways than the ‘outer’ clones, which is interesting as the  
421 link between p53 and inflammation has been previously reported (Figure 3b) (Gudkov et  
422 al., 2011). c5.5, which showed the highest enrichment for the p53 signalling pathway,  
423 showed elevated scores for other pathways as well, even compared to other ‘inner’ clones.  
424

425 Finally, we performed Motif Activity Response Analysis (MARA) to probe the underlying  
426 regulatory factors behind the gene expression changes brought on by the mutations  
427 (Balwierz et al., 2014). MARA combines the predicted transcription factor (TF) binding  
428 sites (represented by TF motifs) found in promoters with the gene expression changes to  
429 calculate the motif activities, which can be used to estimate the responsible TFs for their  
430 regulation. When we applied the analysis using the SwissRegulon collection of TF motifs  
431 on our promoter regions (300 bp downstream and 100 upstream from each CAGE cluster),  
432 we detected a drastic decrease of TP53 motif activities in all the mutant clones compared to  
433 the wild type (Supplementary Figure 8, Supplementary Table 7). Besides the TP53 motif,  
434 those with significant activity variation included the motifs for NFY series of TFs and  
435 NFKB1/REL/RELA, key components of inflammation regulation (Ji et al., 2019). Another  
436 interesting motif was for PITX1, whose activity was down in the ‘outer’ clones c4.8 and  
437 c5.11, and is known to activate p53 by binding to its promoter (Liu and Lobie, 2007).  
438 Ideally, the clones selected for the purpose of this study should exhibit minimal regulatory  
439 changes from the wild type, except for TP53. To rank the clones based on this criterium, we  
440 first calculated the differences in motif activities between each mutant clone and the wild  
441 type, then summed these values for all significant motifs in each mutant clone, except for  
442 TP53. This creates a scoring system where the mutant clones with less regulatory  
443 differences would be assigned smaller values, and vice versa (Figure 3c). Consistent with  
444 previous observations, the ‘outer’ clones c4.8 and c5.11 obtained the highest scores, while  
445 the ‘inner’ clones c5.12 and c5.9 scored the lowest. One exception was c4.2, which  
446 obtained the third lowest score despite being an ‘outer’ clone.  
447

448 **Figure 3.** Down-regulated genes in the mutant clones vs. the wild type are enriched in p53  
449 regulatory signals. (a) Genes with evidence of TP53 ChIP-seq binding show consistent  
450 down-regulation of expression across all samples compared to the wild type. The boxplot  
451 represents the mean log fold change of expression of the TP53-bound genes in mutant  
452 clones vs. the wild type. (b) Down-regulated genes show enrichment of the KEGG p53

453 signalling pathway. Barplot represents the negative log<sub>10</sub> of p-values of pathway  
454 enrichment for each mutant clone. The clones are sorted in the order of increasing values,  
455 and the dotted line represents the p-value threshold of 0.05. (c) Greater motif activity  
456 differences between the ‘outer’ clones and the wild type suggests more extensive regulatory  
457 changes compared to the ‘inner’ clones. The differences in the motif activities between  
458 each mutant clone and the wild type for the significant set of motifs are summed and sorted  
459 to produce the overall ranking of the regulatory changes from the wild type.  
460

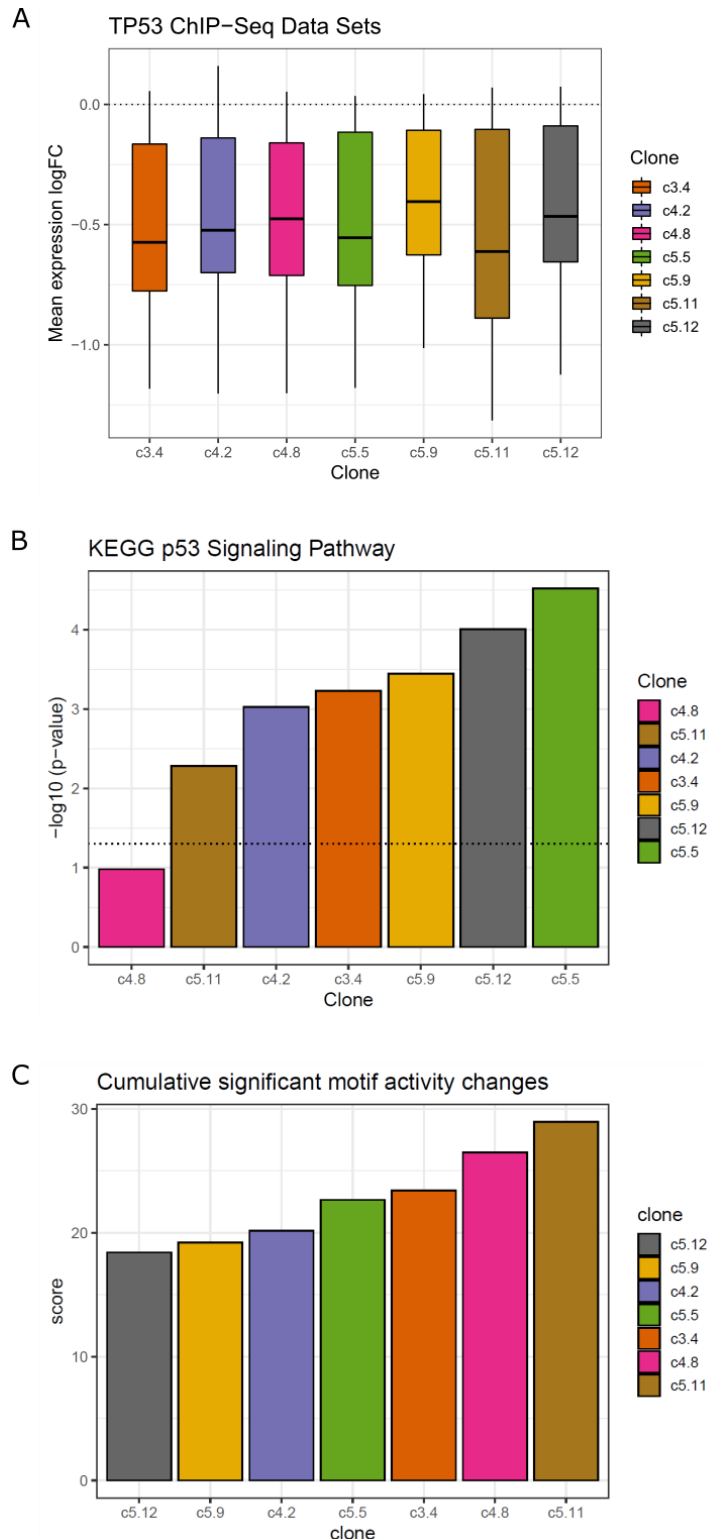

461

462

### 463 **3.3 Phenotypic comparison of selected clones to wild type**

464

465 The transcriptome analysis confirmed that the major transcriptional changes in the mutant  
466 clones were associated with disrupted p53 function. However, it is clear that clone-specific  
467 transcriptomic differences also exist, with a subset of clones showing higher divergence  
468 from the wild type. To fully characterize how these differences will be manifested, we set

469 out to perform further phenotype comparison experiments on the mutant clones. The  
470 phenotype comparison experiments performed in this study were designed to confirm 3  
471 aspects of the mutant clones that would be crucial for the mutants to be useful for ADC  
472 development: disruption of TP53-MDM2 interaction, maintenance of cellular uptake and  
473 localization through surface integrins, and maintenance of tumorigenicity *in vivo*. Those  
474 mutant clones that meet all 3 criteria would qualify as the final candidates for ADC testing  
475 platform.

476  
477 Before embarking on the experiments, however, we attempted to predict which clones were  
478 likely to show smaller or bigger phenotype changes compared to the wild type based on the  
479 transcriptome analysis results. We first separated out the clones c4.8 and c5.11 from the  
480 rest, as they exhibited consistently divergent behaviours from the wild type or other mutant  
481 clones. Clone c4.2 was not proximal to the ‘inner’ group clones in PCA, and obtained lower  
482 enrichment score for the p53 signalling pathway. However, its regulatory signal divergence  
483 from the wild type was at similar levels to those of the ‘inner’ group. The best performing  
484 clones were c 5.5, c5.9, and c5.12, but while c5.5 showed the highest enrichment for the  
485 p53 signalling pathway, it also exhibited higher regulatory changes than c5.9 and c5.12.

486  
487 Taking these observations together, we decided to subject the following subset of mutant  
488 clones to further phenotypic studies and compare their behaviours against the wild type:  
489 c3.4, c5.5, c5.9, c5.12, and c4.2. We predicted that the clones c5.9 and c5.12 would prove  
490 to be the best candidates with the least phenotypic differences from the wild type. As for  
491 c4.2, while it did not appear to be proximal to the wild type, we were nonetheless interested  
492 in observing its phenotypic behaviour compared to the other clones, due to its conflicting  
493 transcriptomic signals and the previously noted rapid *in vitro* growth rate compared to other  
494 samples.

495  
496 **Figure 4.** Cell proliferation assay results support successful disruption of p53-MDM2  
497 interaction leading to decreased sensitivity to inhibitory drug nutlin-3a in mutant clones  
498 compared to the wild type. (a) Cell counts of nutlin-3a-treated groups with increasing drug  
499 dosage measured with WST-8 assay. Cells were incubated with nutlin-3a at 0 to 100  $\mu$ M  
500 for 5 days at 37 °C. The count ratios of nutlin-3a-treated and non-treated cells in 4 replicates  
501 were plotted against different nutlin-3a concentrations (log scale). Results are expressed as  
502 the mean  $\pm$  standard deviation. (b) IC<sub>50</sub> values for nutlin-3a. All mutant clones show IC<sub>50</sub>  
503 values > 20-fold over the wild type.

504

A

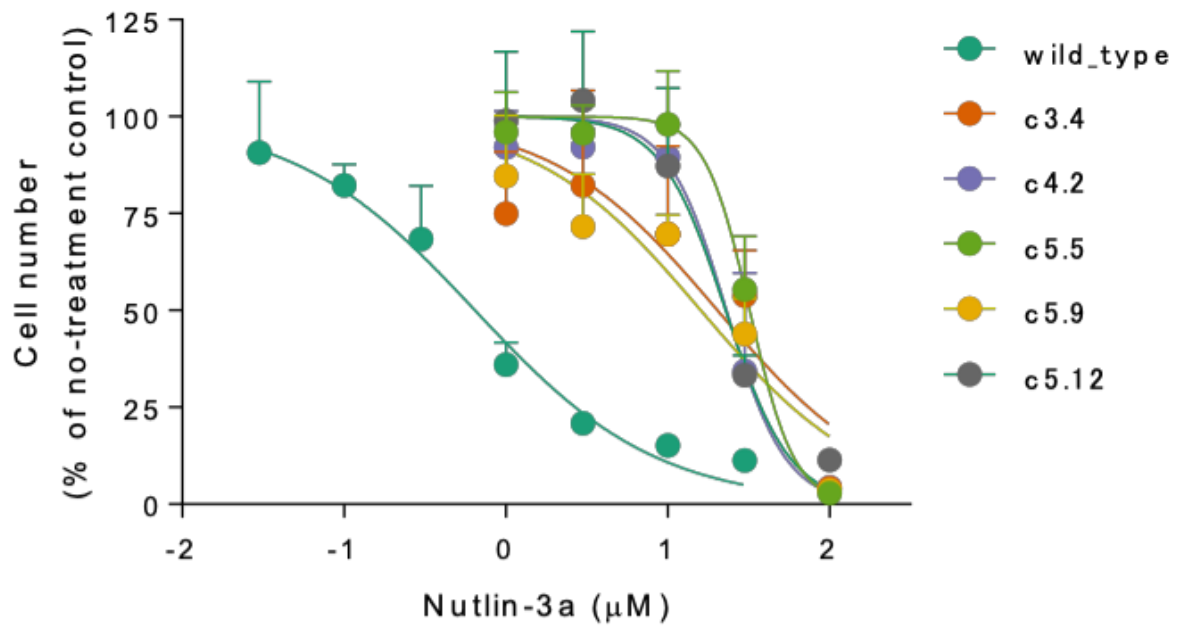

B

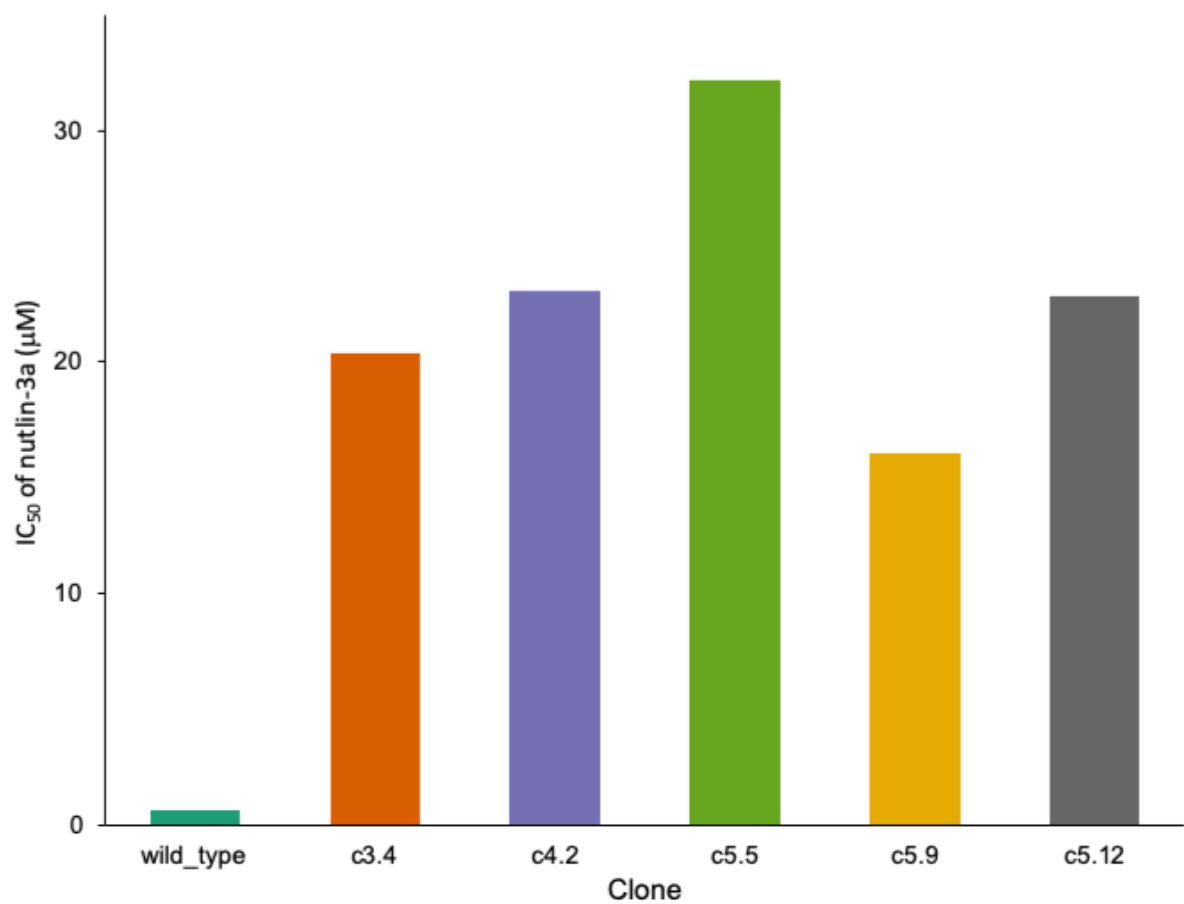

505

506

507 First, we wanted to confirm that the mutation in each clone led to successful disruption of  
508 the p53 protein's capacity to interact with MDM2 and regulate cell growth. Nutlin-3a acts



509 as an inhibitor of p53 and MDM2 interaction by blocking the p53-binding pocket of  
510 MDM2, and is known to activate the p53 pathway in cancer cells, leading to cell cycle  
511 arrest and apoptosis (Villalonga-Planells et al., 2011). Thus, we expected the wild type cells  
512 to have higher sensitivity to the inhibitory effects of nutlin-3a than the mutant clones,  
513 leading to slower growth rate at lower doses of the drug. After incubating the cells for 5  
514 days with increasing dosage of nutlin-3a ranging from 0 to 100  $\mu\text{M}$ , we performed  
515 colorimetric assay with WST-8 to measure the resulting relative cell concentration by  
516 taking the ratio of the absorbance against that of the no-treatment control group (Figure 4a).  
517 As expected, wild type U87MG cells showed high sensitivity to nutlin-3a, with decrease in  
518 cell number observed even at low doses of 0.1  $\mu\text{M}$ , whereas the mutant clones required  
519 greater than 1  $\mu\text{M}$  before any decrease could be observed. Clones c4.2, c5.5, and c5.12  
520 showed the greatest resistance to the drug, requiring greater than 10  $\mu\text{M}$  of dosage before  
521 significant decrease in cell counts could be observed. The  $\text{IC}_{50}$  values for nutlin-3a, which  
522 are half maximal inhibitory concentration representing the potency of an inhibitory drug,  
523 were more than 20-fold higher in the mutant clones than in the wild type cells (Figure 4b).

524

525 **Figure 5.** Flow cytometric analysis after incubation with FITC-RGD peptide shows similar  
526 levels of cellular uptake in both the wild type and mutant clones. The cells were incubated  
527 with the peptide at a final concentration of 20  $\mu\text{M}$  for 4 h at 37°C. (a) Histograms of non-  
528 treated cells (gray) and FITC-RGD-treated cells (green). Vertical line represents the 95%  
529 mark of non-treated cells, and the fluorescein-positive ratios of cells can be seen on the  
530 right of the line. (b) Mean fluorescence intensity (MFI) of FITC-RGD-treated cells as an  
531 index of cellular uptake. The MFI values are calculated by subtracting the fluorescence  
532 intensities of the treated samples from those of the non-treated samples, and the results are  
533 expressed as the means  $\pm$  standard deviations of 3 replicate samples. \*  $P < 0.05$  compared  
534 with the wild type group.

535

A

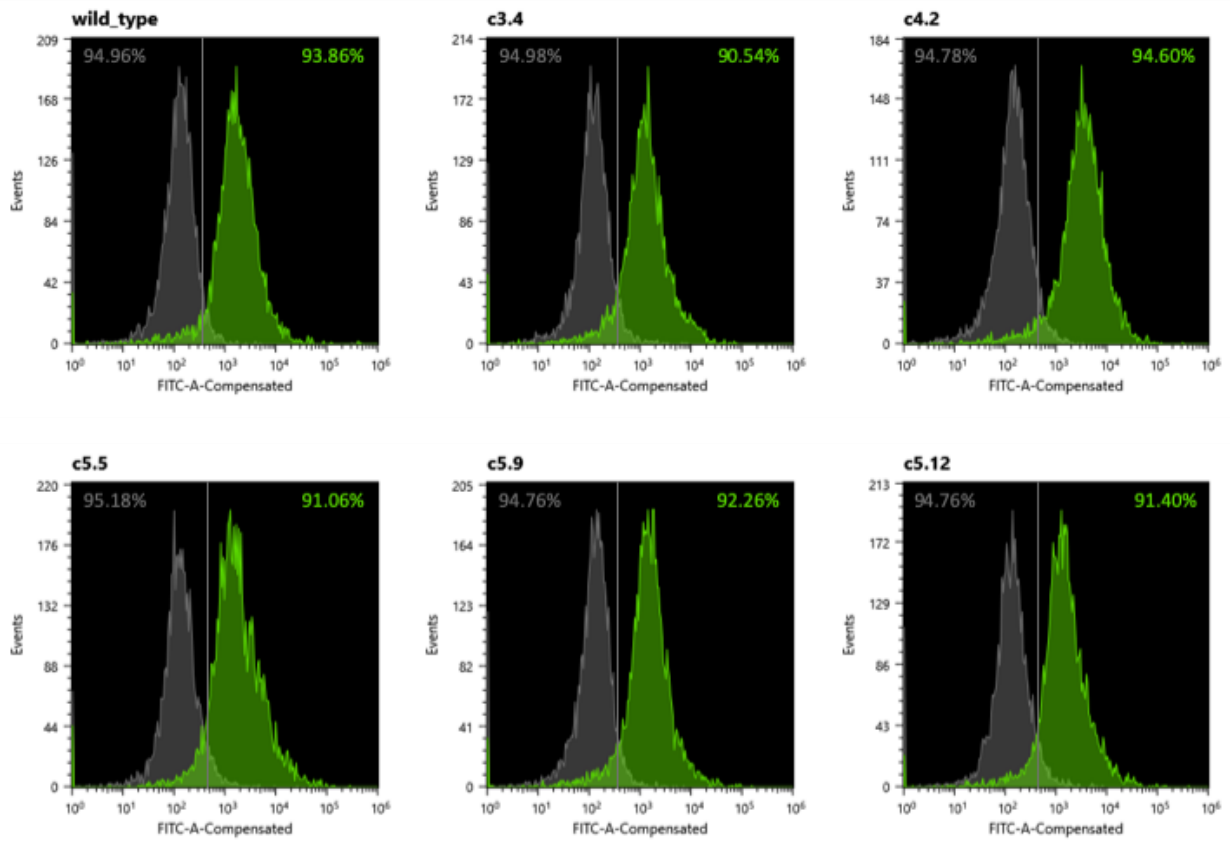

B

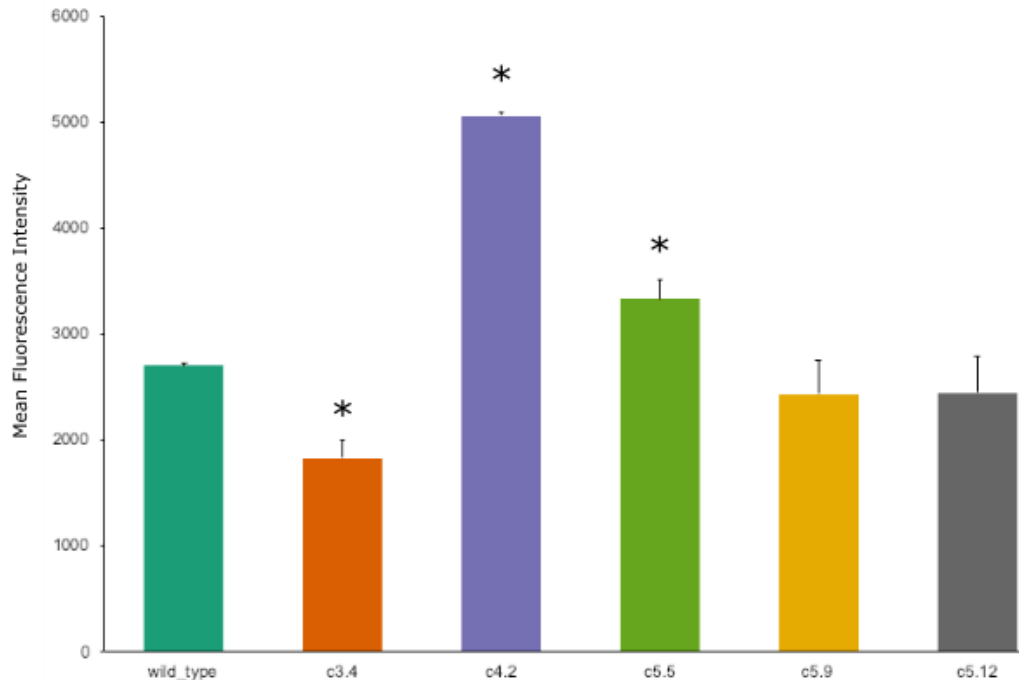

536

537

538 Next, we explored whether the mutant clones retained the same capacity for cellular uptake

539 and intracellular localization of compounds that bind to the surface integrin  $\alpha\beta3$ . As the

540 goal of creating the mutants was to utilize them as testing platforms for ADC development,

541 it was important to ascertain that not only was the integrin expressed at similar levels, as

542 previously seen through fluorescence imaging (Supplementary Figure S2), but that their  
543 binding initiated the same level of endocytosis into the cells. As integrin  $\alpha\beta3$  is  
544 characterized by the exposed arginine-glycine-aspartic (RGD) tripeptide sequence,  
545 fluorescein isothiocyanate (FITC) can be conjugated to RGD peptides and induce its  
546 cellular uptake (Zheng et al., 2014). By performing cytometric analysis based on the  
547 fluorescence observed after the uptake, we could infer whether the activity of the expressed  
548 integrins is maintained across the mutant clones compared to the wild type U87MG. After  
549 incubation with FITC-RGD peptide, both the wild type cells and mutant clones showed  
550 fluorescence intensity shifts of greater than 90%, indicating they take up FITC-RGD  
551 peptides with similar efficiencies (Figure 5a). Clones c5.9 and c5.12 showed similar levels  
552 of mean fluorescence intensity (MFI) as the wild type (Figure 5b). Clones c3.4 and c5.5  
553 showed small but still significant changes in the MFI levels from the wild type. c4.2, the  
554 outlier in our group, showed a significantly higher level compared to the rest of the  
555 samples. When we confirmed the localization of the fluorescence signals in the cells, they  
556 all showed punctuate patterns that co-localize with lysosome locations, suggesting that the  
557 FITC-RGD peptides were transported to lysosomes after their cellular uptake  
558 (Supplementary Figure 9).

559

560 **Figure 6.** Tumour growth in BALB/c nu/nu mice after subcutaneous inoculation reveals the  
561 differences in the *in vivo* growth rates. (a) Increase in tumour volume over time. Results are  
562 expressed as a mean  $\pm$  standard error of 8 mice (wild type, c5.9, c5.12 and c3.4), 7 mice  
563 (c4.2), or 6 mice (c5.5). Of the mutant clones tested, clones c3.4, c4.2 and c5.12 exhibit  
564 similar growth rates as the wild type. (b) Kaplan-Meier plots with the ratio of mice with  
565 tumour volume over 1,000 mm<sup>3</sup> again show that the clones c5.5 and c5.9 exhibit different  
566 tumour growth patterns from the other samples. (\*  $P < 0.05$  compared with the U87MG  
567 tumour bearing mice group)

568

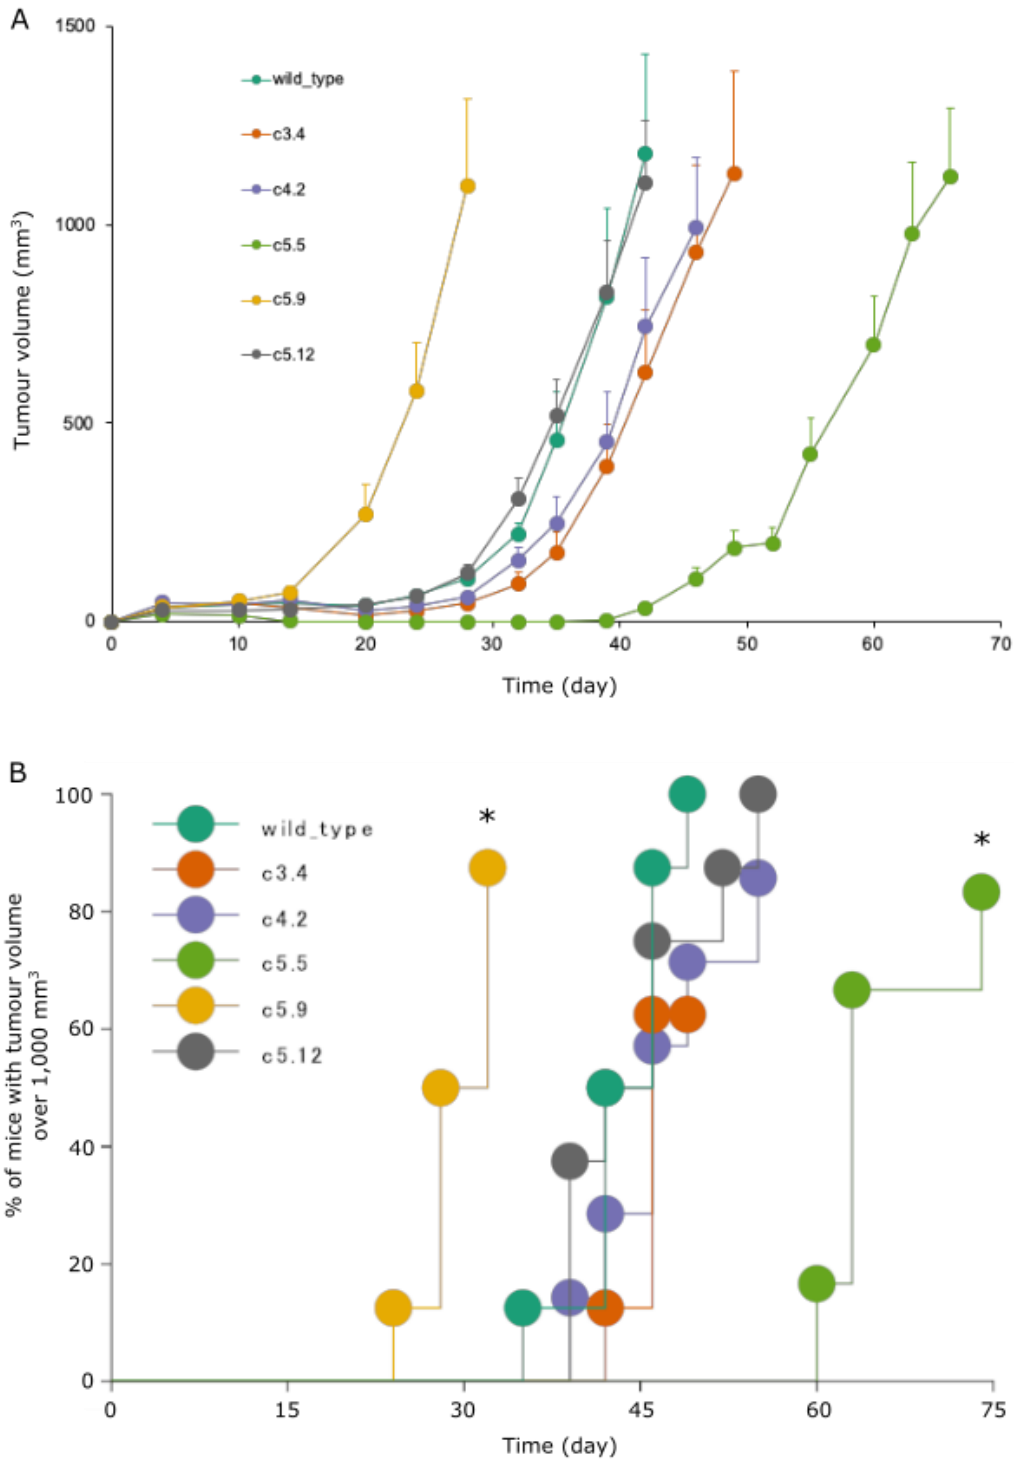

569

570

571 Finally, as we wanted to confirm the usability of the mutants for drug delivery system  
572 testing *in vivo*, we injected the cells subcutaneously into 5-week old mice and measured the  
573 tumour growth over the course of 70 days and examined whether there were any  
574 differences in their behaviour. Of the 5 mutant clones tested, clones c3.4, c4.2 and c5.12  
575 achieved similar tumour growth as the wild type U87MG cells, while the clone 5.9  
576 exhibited faster growth rate and c5.5 slower growth rate (Figure 6a). Most of the mutant  
577 clones and the wild type resulted in tumour growth in all the mice they were inoculated

578 into, with the exception of clone c4.2 (7 out of 8 mice with tumour growth) and c5.5 (6 out  
579 of 8 mice with tumour growth) (Supplementary Table 8). One interesting observation was  
580 that the clone c4.2 showed similar *in vivo* growth as the wild type, even though *in vitro*,  
581 they exhibited higher growth rate. The same pattern of tumour growth rate differences  
582 could be observed when we measured the percentage of inoculated mice with tumour  
583 volumes greater than 1,000 mm<sup>3</sup> over time (Figure 6b). Mice inoculated with clones c3.4,  
584 c4.2 and c5.12 exhibited similar rates of tumour growth, with greater than 50% of the mice  
585 exceeding 1,000 mm<sup>3</sup> between 40 to 50 days after inoculation. Mice injected with the  
586 clones c5.9 and c5.5 differed significantly ( $P < 0.05$ ), with those with clone c5.9 exceeding  
587 this figure before 30 days, while those with c5.5 needed more than 60 days.

588  
589 In summary, the phenotypic comparison experiments strongly support the successful  
590 creation of the p53 mutant clone c5.12 to be utilized for p53-specific *in vitro* testing  
591 platforms. This clone not only demonstrated disrupted interaction between p53 and MDM2  
592 (Figure 4), but also maintained the capacity for cellular uptake through the surface integrin  
593  $\alpha\beta3$  (Figure 5) and *in vivo* tumour growth as the wild type (Figure 6). While clones c3.4  
594 and c4.2 also exhibited similar *in vivo* growth as the wild type, signs pointing to their  
595 significantly different cellular uptake prevented us from including them in the group of top  
596 candidate clones (Figure 5).

597

## 598 **4 Discussion**

599

600 In development of novel targeted therapeutics, there is an acute need for efficient  
601 procedures for establishing cell line-based testing platforms where the differences between  
602 the test and control samples are limited to the gene being targeted in order to avoid  
603 unwanted secondary effects stemming from other genomic differences. In order to improve  
604 upon the current situation where many researchers have to rely on two dissimilar cell lines,  
605 we employed CRISPR-Cas9 system to create targeted mutation of p53 in the U87MG cell  
606 line, while minimizing other genomic changes that may complicate interpretations of  
607 experimental results. While such endeavours have been previously made, we here took the  
608 extra step of performing detailed transcriptome profiling using CAGE and classified the  
609 clones into ‘inner’ and ‘outer’ groups, based on the amount of accompanying genetic  
610 disruptions compared to the wild type. Of the ‘inner’ group members, we further predicted  
611 that the clones c5.9 and c5.12 would be the best candidates to be used in the testing  
612 platform. We followed up with phenotype analysis experiments designed to fully  
613 characterize the mutant clones created and evaluate our predictions. The cell proliferation  
614 assay with p53-MDM2 interaction inhibitor nutlin-3a confirmed reduced interaction in the  
615 mutant clones. The FITC-RGD peptide uptake assay confirmed that the cellular uptake and  
616 localization through integrin  $\alpha\beta3$  remains intact in the mutant clones. Finally, tumour  
617 xenograft experiments in mice showed that 3 of the 5 mutant clones have similar *in vivo*  
618 growth rates as the wild type.

619

620 Based on the overall analysis results, we select the clone c5.12 as the best candidates for  
621 serving as the testing platform with the parent U87MG cell line as the control. Not only do  
622 this clone show relatively low genomic changes stemming from the p53 mutation, it is  
623 highly resistant to nutlin-3a, indicating strong inactivation of p53-MDM2 interaction, while  
624 still exhibiting similar levels of integrin functionality and *in vivo* growth behaviours. c5.12  
625 was one of our two predicted candidates based on transcriptomic analysis. While c5.9, the  
626 other top predicted candidate, proved to have more rapid *in vivo* growth rate than the wild  
627 type, it performed comparatively similar in most of the other phenotypic measures.

628

629 This does not mean, however, that other clones are not of further research interests, as  
630 individual differences manifested through their transcriptome and phenotype changes  
631 present intriguing prospects of further investigation into their causes, and their inclusion in  
632 the development pipeline provides additional opportunities to control for clone specific  
633 effects. The CAGE technology used in this study offers many attractive advantages, as the  
634 data can be used to identify differentially expressed enhancers and various noncoding  
635 RNAs, both annotated and unannotated (Andersson et al., 2014; Hon et al., 2017). p53 is  
636 known to have complex regulatory relationships with many other genes, some of which are  
637 of noncoding type (Dangelmaier et al., 2019; Hu et al., 2018; Khan et al., 2019; Li et al.,  
638 2017). Some of these noncoding regulatory partners of p53 may be included in the list of  
639 differentially expressed promoters and enhancers we have identified in this study, which  
640 would serve as interesting research directions to follow upon.

641

642 Moving forward, we believe that we can employ the strategy used in this study for tailor-  
643 building of control-mutant cell line pairs targeting many different genes, both for the  
644 surface marker and the intracellular target. Being able to build a repertoire of these cell line  
645 platforms would greatly facilitate the ongoing development efforts for novel targeted  
646 therapeutics and their delivery methods. The newly created mutant clones are available as a  
647 resource, and can be provided upon request. The transcriptomic profiles of the clones in the  
648 form of CAGE data can be downloaded from GEO series **GSE155461** for those interested  
649 in further analysis.

650

## 651 **5 Conclusion**

652

653 Using the CRISPR-Cas9 system, we have successfully performed targeted mutation of  
654 TP53 in U87MG for the purpose of building an *in vitro* drug testing platform, and through  
655 transcriptomics and phenotypic studies, demonstrate that only limited biological changes  
656 from the wild type are found.

657

## 658 **Author Contributions**

659

660 Conceptualization, EA, HM, ShT, HS; methodology, AK, KM, SaT, TA, MT, BK;  
661 software, AK, BK; investigation, AK, KM, SaT, TA, MT; validation, SaT, TA, KM, MT;  
662 formal analysis, AK, KM, BK; data curation, AK; writing—original draft preparation, AK,  
663 KM, SaT, TA; writing—review and editing, AK, KM, SaT, TA, BK, HS, ShT, HM, EA;  
664 visualization, AK, KM, SaT, TA; supervision, EA, HM; project administration, AK, EA,  
665 MF; funding acquisition, EA, ShT, HM, HS, MF.

666

## 667 **Funding**

668

669 This work was supported by a Research Grant from the Japanese Ministry of Education,  
670 Culture, Sports, Science and Technology (MEXT) to the RIKEN Center for Integrative  
671 Medical Sciences.

672

## 673 **Acknowledgments**

674

675 The authors would like to thank Piero Carninci, Mikako Shirouzu, Kensaku Sakamoto and  
676 Yasuyoshi Watanabe for creating the research environment that enabled this research.

677

678

## 679 **References**

680

681 Alam, T., Agrawal, S., Severin, J., Young, R.S., Andersson, R., Arner, E., Hasegawa, A.,  
682 Lizio, M., Ramilowski, J.A., Abugessaisa, I., Ishizu, Y., Noma, S., Tarui, H., Taylor,  
683 M.S., Lassmann, T., Itoh, M., Kasukawa, T., Kawaji, H., Marchionni, L., Sheng, G.,  
684 Forrest, A.R.R., Khachigian, L.M., Hayashizaki, Y., Carninci, P., Hoon, M.J.L. de,  
685 2020. Comparative transcriptomics of primary cells in vertebrates. *Genome Res.*  
686 <https://doi.org/10.1101/gr.255679.119>

687 Andersson, R., Gebhard, C., Miguel-Escalada, I., Hoof, I., Bornholdt, J., Boyd, M., Chen,  
688 Y., Zhao, X., Schmidl, C., Suzuki, T., Ntini, E., Arner, E., Valen, E., Li, K.,  
689 Schwarzfischer, L., Glatz, D., Raithel, J., Lilje, B., Rapin, N., Bagger, F.O.,  
690 Jørgensen, M., Andersen, P.R., Bertin, N., Rackham, O., Burroughs, A.M., Baillie,  
691 J.K., Ishizu, Y., Shimizu, Y., Furuhata, E., Maeda, S., Negishi, Y., Mungall, C.J.,  
692 Meehan, T.F., Lassmann, T., Itoh, M., Kawaji, H., Kondo, N., Kawai, J., Lennartsson,  
693 A., Daub, C.O., Heutink, P., Hume, D.A., Jensen, T.H., Suzuki, H., Hayashizaki, Y.,  
694 Müller, F., FANTOM Consortium, Forrest, A.R.R., Carninci, P., Rehli, M., Sandelin,  
695 A., 2014. An atlas of active enhancers across human cell types and tissues. *Nature*  
696 507, 455–461. <https://doi.org/10.1038/nature12787>

697 Bae, S., Park, J., Kim, J.-S., 2014. Cas-OFFinder: a fast and versatile algorithm that searches  
698 for potential off-target sites of Cas9 RNA-guided endonucleases. *Bioinformatics* 30,  
699 1473–1475. <https://doi.org/10.1093/bioinformatics/btu048>

700 Balwierz, P.J., Pachkov, M., Arnold, P., Gruber, A.J., Zavolan, M., van Nimwegen, E., 2014.  
701 ISMARA: automated modeling of genomic signals as a democracy of regulatory  
702 motifs. *Genome Research* 24, 869–884. <https://doi.org/10.1101/gr.169508.113>

703 Basu, A., Haldar, S., 1998. The relationship between Bcl2, Bax and p53: consequences for  
704 cell cycle progression and cell death. *Mol Hum Reprod* 4, 1099–1109.  
705 <https://doi.org/10.1093/molehr/4.12.1099>

706 Bensaad, K., Tsuruta, A., Selak, M.A., Vidal, M.N.C., Nakano, K., Bartrons, R., Gottlieb, E.,  
707 Vousden, K.H., 2006. TIGAR, a p53-Inducible Regulator of Glycolysis and  
708 Apoptosis. *Cell* 126, 107–120. <https://doi.org/10.1016/j.cell.2006.05.036>

709 Camphausen, K., Purow, B., Sproull, M., Scott, T., Ozawa, T., Deen, D.F., Tofilon, P.J.,  
710 2005. Influence of in vivo growth on human glioma cell line gene expression:  
711 Convergent profiles under orthotopic conditions. *PNAS* 102, 8287–8292.  
712 <https://doi.org/10.1073/pnas.0502887102>

713 Carninci, P., Sandelin, A., Lenhard, B., Katayama, S., Shimokawa, K., Ponjavic, J., Semple,  
714 C. a M., Taylor, M.S., Engström, P.G., Frith, M.C., Forrest, A.R.R., Alkema, W.B.,  
715 Tan, S.L., Plessy, C., Kodzius, R., Ravasi, T., Kasukawa, T., Fukuda, S., Kanamori-  
716 Katayama, M., Kitazume, Y., Kawaji, H., Kai, C., Nakamura, M., Konno, H.,  
717 Nakano, K., Mottagui-Tabar, S., Arner, P., Chesi, A., Gustincich, S., Persichetti, F.,  
718 Suzuki, H., Grimmond, S.M., Wells, C. a, Orlando, V., Wahlestedt, C., Liu, E.T.,  
719 Harbers, M., Kawai, J., Bajic, V.B., Hume, D. a, Hayashizaki, Y., 2006. Genome-  
720 wide analysis of mammalian promoter architecture and evolution. *Nature genetics* 38,  
721 626–35. <https://doi.org/10.1038/ng1789>



- 722 Cobbs, C.S., Soroceanu, L., Denham, S., Zhang, W., Kraus, M.H., 2008. Modulation of  
723 Oncogenic Phenotype in Human Glioma Cells by Cytomegalovirus IE1-Mediated  
724 Mitogenicity. *Cancer Research* 68, 724–730. [https://doi.org/10.1158/0008-](https://doi.org/10.1158/0008-5472.CAN-07-2291)  
725 [5472.CAN-07-2291](https://doi.org/10.1158/0008-5472.CAN-07-2291)
- 726 Dangelmaier, E., Lazar, S.B., Lal, A., 2019. Long noncoding RNAs: p53’s secret weapon in  
727 the fight against cancer? *PLOS Biology* 17, e3000143.  
728 <https://doi.org/10.1371/journal.pbio.3000143>
- 729 Enge, M., Bao, W., Hedström, E., Jackson, S.P., Moumen, A., Selivanova, G., 2009. MDM2-  
730 Dependent Downregulation of p21 and hnRNP K Provides a Switch between  
731 Apoptosis and Growth Arrest Induced by Pharmacologically Activated p53. *Cancer*  
732 *Cell* 15, 171–183. <https://doi.org/10.1016/j.ccr.2009.01.019>
- 733 FANTOM Consortium, 2014. A promoter-level mammalian expression atlas. *Nature* 507,  
734 462–70. <https://doi.org/10.1038/nature13182>
- 735 Firer, M.A., Gellerman, G., 2012. Targeted drug delivery for cancer therapy: the other side  
736 of antibodies. *Journal of hematology & oncology* 5, 70. [https://doi.org/10.1186/1756-](https://doi.org/10.1186/1756-8722-5-70)  
737 [8722-5-70](https://doi.org/10.1186/1756-8722-5-70)
- 738 Frankish, A., Diekhans, M., Ferreira, A.-M., Johnson, R., Jungreis, I., Loveland, J., Mudge,  
739 J.M., Sisu, C., Wright, J., Armstrong, J., Barnes, I., Berry, A., Bignell, A., Carbonell  
740 Sala, S., Chrast, J., Cunningham, F., Di Domenico, T., Donaldson, S., Fiddes, I.T.,  
741 García Girón, C., Gonzalez, J.M., Grego, T., Hardy, M., Hourlier, T., Hunt, T.,  
742 Izuogu, O.G., Lagarde, J., Martin, F.J., Martínez, L., Mohanan, S., Muir, P., Navarro,  
743 F.C.P., Parker, A., Pei, B., Pozo, F., Ruffier, M., Schmitt, B.M., Stapleton, E., Suner,  
744 M.-M., Sycheva, I., Uszczynska-Ratajczak, B., Xu, J., Yates, A., Zerbino, D., Zhang,  
745 Y., Aken, B., Choudhary, J.S., Gerstein, M., Guigó, R., Hubbard, T.J.P., Kellis, M.,  
746 Paten, B., Reymond, A., Tress, M.L., Flicek, P., 2019. GENCODE reference  
747 annotation for the human and mouse genomes. *Nucleic Acids Res* 47, D766–D773.  
748 <https://doi.org/10.1093/nar/gky955>
- 749 Gudkov, A.V., Gurova, K.V., Komarova, E.A., 2011. Inflammation and p53. *Genes Cancer*  
750 2, 503–516. <https://doi.org/10.1177/1947601911409747>
- 751 Hafner, A., Bulyk, M.L., Jambhekar, A., Lahav, G., 2019. The multiple mechanisms that  
752 regulate p53 activity and cell fate. *Nature Reviews Molecular Cell Biology* 20, 199–  
753 210. <https://doi.org/10.1038/s41580-019-0110-x>
- 754 Hasegawa, A., Daub, C., Carninci, P., Hayashizaki, Y., Lassmann, T., 2014. MOIRAI: a  
755 compact workflow system for CAGE analysis. *BMC Bioinformatics* 15, 144.  
756 <https://doi.org/10.1186/1471-2105-15-144>
- 757 Hon, C.-C., Ramilowski, J.A., Harshbarger, J., Bertin, N., Rackham, O.J.L., Gough, J.,  
758 Denisenko, E., Schmeier, S., Poulsen, T.M., Severin, J., Lizio, M., Kawaji, H.,  
759 Kasukawa, T., Itoh, M., Burroughs, A.M., Noma, S., Djebali, S., Alam, T.,  
760 Medvedeva, Y.A., Testa, A.C., Lipovich, L., Yip, C.-W., Abugessaisa, I., Mendez,  
761 M., Hasegawa, A., Tang, D., Lassmann, T., Heutink, P., Babina, M., Wells, C.A.,  
762 Kojima, S., Nakamura, Y., Suzuki, H., Daub, C.O., Hoon, M.J.L. de, Arner, E.,  
763 Hayashizaki, Y., Carninci, P., Forrest, A.R.R., 2017. An atlas of human long non-

- 764 coding RNAs with accurate 5' ends. *Nature* 543, 199–204.  
765 <https://doi.org/10.1038/nature21374>
- 766 Hsu, P.D., Lander, E.S., Zhang, F., 2014. Development and Applications of CRISPR-Cas9  
767 for Genome Engineering. *Cell* 157, 1262–1278.  
768 <https://doi.org/10.1016/j.cell.2014.05.010>
- 769 Hu, W.L., Jin, L., Xu, A., Wang, Y.F., Thorne, R.F., Zhang, X.D., Wu, M., 2018. GUARDIN  
770 is a p53-responsive long non-coding RNA that is essential for genomic stability.  
771 *Nature Cell Biology* 20, 492–502. <https://doi.org/10.1038/s41556-018-0066-7>
- 772 Ji, Z., He, L., Regev, A., Struhl, K., 2019. Inflammatory regulatory network mediated by the  
773 joint action of NF- $\kappa$ B, STAT3, and AP-1 factors is involved in many human cancers.  
774 *PNAS* 116, 9453–9462. <https://doi.org/10.1073/pnas.1821068116>
- 775 Jinek, M., Chylinski, K., Fonfara, I., Hauer, M., Doudna, J.A., Charpentier, E., 2012. A  
776 Programmable Dual-RNA-Guided DNA Endonuclease in Adaptive Bacterial  
777 Immunity. *Science* 337, 816–821. <https://doi.org/10.1126/science.1225829>
- 778 Kamp, W.M., Wang, P., Hwang, P.M., 2016. TP53 mutation, mitochondria and cancer.  
779 *Current Opinion in Genetics & Development, Molecular and genetic bases of disease*  
780 38, 16–22. <https://doi.org/10.1016/j.gde.2016.02.007>
- 781 Kanamori-Katayama, M., Itoh, M., Kawaji, H., Lassmann, T., Katayama, S., Kojima, M.,  
782 Bertin, N., Kaiho, A., Ninomiya, N., Daub, C.O., Carninci, P., Forrest, A.R.R.,  
783 Hayashizaki, Y., 2011. Unamplified cap analysis of gene expression on a single-  
784 molecule sequencer. *Genome research* 21, 1150–9.  
785 <https://doi.org/10.1101/gr.115469.110>
- 786 Khan, M.R., Bukhari, I., Khan, R., Hussain, H.M.J., Wu, M., Thorne, R.F., Li, J., Liu, G.,  
787 2019. TP53LNC-DB, the database of lncRNAs in the p53 signalling network.  
788 *Database (Oxford)* 2019. <https://doi.org/10.1093/database/bay136>
- 789 Lambert, J.M., Chari, R.V.J., 2014. Ado-trastuzumab Emtansine (T-DM1): An Antibody–  
790 Drug Conjugate (ADC) for HER2-Positive Breast Cancer. *J. Med. Chem.* 57, 6949–  
791 6964. <https://doi.org/10.1021/jm500766w>
- 792 Larkin, M.A., Blackshields, G., Brown, N.P., Chenna, R., McGettigan, P.A., McWilliam, H.,  
793 Valentin, F., Wallace, I.M., Wilm, A., Lopez, R., Thompson, J.D., Gibson, T.J.,  
794 Higgins, D.G., 2007. Clustal W and Clustal X version 2.0. *Bioinformatics* 23, 2947–  
795 2948. <https://doi.org/10.1093/bioinformatics/btm404>
- 796 Leroy, B., Ballinger, M.L., Baran-Marszak, F., Bond, G.L., Braithwaite, A., Concin, N.,  
797 Donehower, L.A., El-Deiry, W.S., Fenaux, P., Gaidano, G., Langerød, A., Hellstrom-  
798 Lindberg, E., Iggo, R., Lehmann-Che, J., Mai, P.L., Malkin, D., Moll, U.M., Myers,  
799 J.N., Nichols, K.E., Pospisilova, S., Ashton-Prolla, P., Rossi, D., Savage, S.A.,  
800 Strong, L.C., Tonin, P.N., Zeillinger, R., Zenz, T., Fraumeni, J.F., Taschner, P.E.M.,  
801 Hainaut, P., Soussi, T., 2017. Recommended Guidelines for Validation, Quality  
802 Control, and Reporting of TP53 Variants in Clinical Practice. *Cancer Res* 77, 1250–  
803 1260. <https://doi.org/10.1158/0008-5472.CAN-16-2179>
- 804 Li, X.L., Subramanian, M., Jones, M.F., Chaudhary, R., Singh, D.K., Zong, X., Gryder, B.,  
805 Sindri, S., Mo, M., Schetter, A., Wen, X., Parvathaneni, S., Kazandjian, D., Jenkins,  
806 L.M., Tang, W., Elloumi, F., Martindale, J.L., Huarte, M., Zhu, Y., Robles, A.I., Frier,

- 807 S.M., Rigo, F., Cam, M., Ambs, S., Sharma, S., Harris, C.C., Dasso, M., Prasanth,  
808 K.V., Lal, A., 2017. Long Noncoding RNA PURPL Suppresses Basal p53 Levels and  
809 Promotes Tumorigenicity in Colorectal Cancer. *Cell Rep* 20, 2408–2423.  
810 <https://doi.org/10.1016/j.celrep.2017.08.041>
- 811 Liu, D.X., Lobie, P.E., 2007. Transcriptional activation of p53 by Pitx1. *Cell Death &*  
812 *Differentiation* 14, 1893–1907. <https://doi.org/10.1038/sj.cdd.4402209>
- 813 Mantovani, F., Collavin, L., Del Sal, G., 2019. Mutant p53 as a guardian of the cancer cell.  
814 *Cell Death & Differentiation* 26, 199–212. [https://doi.org/10.1038/s41418-018-0246-](https://doi.org/10.1038/s41418-018-0246-9)  
815 [9](https://doi.org/10.1038/s41418-018-0246-9)
- 816 Meng, X., Tackmann, N.R., Liu, S., Yang, J., Dong, J., Wu, C., Cox, A.D., Zhang, Y., 2016.  
817 RPL23 Links Oncogenic RAS Signaling to p53-Mediated Tumor Suppression.  
818 *Cancer Res* 76, 5030–5039. <https://doi.org/10.1158/0008-5472.CAN-15-3420>
- 819 Mullard, A., 2013. Maturing antibody–drug conjugate pipeline hits 30. *Nature Reviews Drug*  
820 *Discovery* 12, 329–332. <https://doi.org/10.1038/nrd4009>
- 821 Murata, M., Nishiyori-Sueki, H., Kojima-Ishiyama, M., Carninci, P., Hayashizaki, Y., Itoh,  
822 M., 2014. Detecting Expressed Genes Using CAGE, in: Miyamoto-Sato, E., Ohashi,  
823 H., Sasaki, H., Nishikawa, J., Yanagawa, H. (Eds.), *Transcription Factor Regulatory*  
824 *Networks: Methods and Protocols, Methods in Molecular Biology*. Springer, New  
825 York, NY, pp. 67–85. [https://doi.org/10.1007/978-1-4939-0805-9\\_7](https://doi.org/10.1007/978-1-4939-0805-9_7)
- 826 Niu, N., Wang, L., 2015. In vitro human cell line models to predict clinical response to  
827 anticancer drugs. *Pharmacogenomics* 16, 273–285.  
828 <https://doi.org/10.2217/pgs.14.170>
- 829 Pachkov, M., Erb, I., Molina, N., van Nimwegen, E., 2007. SwissRegulon: a database of  
830 genome-wide annotations of regulatory sites. *Nucleic acids research* 35, D127–31.  
831 <https://doi.org/10.1093/nar/gkl857>
- 832 Panowski, S., Bhakta, S., Raab, H., Polakis, P., Junutula, J.R., 2014. Site-specific antibody  
833 drug conjugates for cancer therapy. *mAbs* 6, 34–45.  
834 <https://doi.org/10.4161/mabs.27022>
- 835 Peters, C., Brown, S., 2015. Antibody–drug conjugates as novel anti-cancer  
836 chemotherapeutics. *Biosci Rep* 35. <https://doi.org/10.1042/BSR20150089>
- 837 Qin, N., Han, F., Li, L., Ge, Y., Lin, W., Wang, J., Wu, L., Zhao, G., Deng, Y., Zhang, J.,  
838 2019. Deubiquitinating enzyme 4 facilitates chemoresistance in glioblastoma by  
839 inhibiting P53 activity. *Oncology Letters* 17, 958–964.  
840 <https://doi.org/10.3892/ol.2018.9654>
- 841 R Development Core Team, 2008. *R: A Language and Environment for Statistical*  
842 *Computing*, Vienna Austria R Foundation for Statistical Computing, Tertiary R: A  
843 language and environment for statistical computing. R Foundation for Statistical  
844 Computing, Vienna, Austria.
- 845 Ran, F.A., Hsu, P.D., Wright, J., Agarwala, V., Scott, D.A., Zhang, F., 2013. Genome  
846 engineering using the CRISPR-Cas9 system. *Nature protocols* 8, 2281–308.  
847 <https://doi.org/10.1038/nprot.2013.143>

- 848 Robinson, M.D., McCarthy, D.J., Smyth, G.K., 2010. edgeR: a Bioconductor package for  
849 differential expression analysis of digital gene expression data. *Bioinformatics*  
850 (Oxford, England) 26, 139–40. <https://doi.org/10.1093/bioinformatics/btp616>
- 851 Scott, A.M., Wolchok, J.D., Old, L.J., 2012. Antibody therapy of cancer. *Nature Reviews*  
852 *Cancer* 12, 278–287. <https://doi.org/10.1038/nrc3236>
- 853 Serrano, M.A., Li, Z., Dangeti, M., Musich, P.R., Patrick, S., Roginskaya, M., Cartwright,  
854 B., Zou, Y., 2013. DNA-PK, ATM and ATR collaboratively regulate p53–RPA  
855 interaction to facilitate homologous recombination DNA repair. *Oncogene* 32, 2452–  
856 2462. <https://doi.org/10.1038/onc.2012.257>
- 857 Sloan, E.K., Pouliot, N., Stanley, K.L., Chia, J., Moseley, J.M., Hards, D.K., Anderson, R.L.,  
858 2006. Tumor-specific expression of  $\alpha\beta 3$  integrin promotes spontaneous metastasis  
859 of breast cancer to bone. *Breast Cancer Res* 8, R20. <https://doi.org/10.1186/bcr1398>
- 860 Sorolla, A., Wang, E., Golden, E., Duffy, C., Henriques, S.T., Redfern, A.D., Blancafort, P.,  
861 2020. Precision medicine by designer interference peptides: applications in oncology  
862 and molecular therapeutics. *Oncogene* 39, 1167–1184.  
863 <https://doi.org/10.1038/s41388-019-1056-3>
- 864 Stein, E.M., Walter, R.B., Erba, H.P., Fathi, A.T., Advani, A.S., Lancet, J.E., Ravandi, F.,  
865 Kovacsovics, T., DeAngelo, D.J., Bixby, D., Faderl, S., Jillella, A.P., Ho, P.A.,  
866 O’Meara, M.M., Zhao, B., Biddle-Snead, C., Stein, A.S., 2018. A phase 1 trial of  
867 vadastuximab talirine as monotherapy in patients with CD33-positive acute myeloid  
868 leukemia. *Blood* 131, 387–396. <https://doi.org/10.1182/blood-2017-06-789800>
- 869 Suzuki, T., Nakano-Ikegaya, M., Yabukami-Okuda, H., Hoon, M. de, Severin, J., Saga-  
870 Hatano, S., Shin, J.W., Kubosaki, A., Simon, C., Hasegawa, Y., Hayashizaki, Y.,  
871 Suzuki, H., 2012. Reconstruction of Monocyte Transcriptional Regulatory Network  
872 Accompanies Monocytic Functions in Human Fibroblasts. *PLOS ONE* 7, e33474.  
873 <https://doi.org/10.1371/journal.pone.0033474>
- 874 Tang, H., Liu, Y., Yu, Z., Sun, M., Lin, L., Liu, W., Han, Q., Wei, M., Jin, Y., 2019. The  
875 Analysis of Key Factors Related to ADCs Structural Design. *Front. Pharmacol.* 10.  
876 <https://doi.org/10.3389/fphar.2019.00373>
- 877 Villalonga-Planells, R., Coll-Mulet, L., Martínez-Soler, F., Castaño, E., Acebes, J.-J.,  
878 Giménez-Bonafé, P., Gil, J., Tortosa, A., 2011. Activation of p53 by Nutlin-3a  
879 Induces Apoptosis and Cellular Senescence in Human Glioblastoma Multiforme.  
880 *PLOS ONE* 6, e18588. <https://doi.org/10.1371/journal.pone.0018588>
- 881 Wanzel, M., Vischedyk, J.B., Gittler, M.P., Gremke, N., Seiz, J.R., Hefter, M., Noack, M.,  
882 Savai, R., Mernberger, M., Charles, J.P., Schneikert, J., Bretz, A.C., Nist, A., Stiewe,  
883 T., 2015. CRISPR-Cas9–based target validation for p53-reactivating model  
884 compounds. *Nature Chemical Biology* 12, 22–28.  
885 <https://doi.org/10.1038/nchembio.1965>
- 886 Weigelt, B., Peterse, J.L., van’t Veer, L.J., 2005. Breast cancer metastasis: markers and  
887 models. *Nature Reviews Cancer* 5, 591–602. <https://doi.org/10.1038/nrc1670>
- 888 Xiong, M., Fang, X., Zhao, J., 2001. Biomarker identification by feature wrappers. *Genome*  
889 *research* 11, 1878–87. <https://doi.org/10.1101/gr.190001>

- 890 Yount, G.L., Afshar, G., Ries, S., Korn, M., Shalev, N., Basila, D., McCormick, F., Haas-  
891 Kogan, D.A., 2001. Transcriptional activation of TRADD mediates p53-independent  
892 radiation-induced apoptosis of glioma cells. *Oncogene* 20, 2826–2835.  
893 <https://doi.org/10.1038/sj.onc.1204393>
- 894 Zheng, Y., Ji, S., Czerwinski, A., Valenzuela, F., Pennington, M., Liu, S., 2014. FITC-  
895 Conjugated Cyclic RGD Peptides as Fluorescent Probes for Staining Integrin  
896  $\alpha\beta3/\alpha\beta5$  in Tumor Tissues. *Bioconjug Chem* 25, 1925–1941.  
897 <https://doi.org/10.1021/bc500452y>  
898
